# Supplementary material for: Tumor resection ameliorates tumor-induced suppression of neuroinflammatory and behavioral responses to an immune challenge in a cancer survivor model
Source: PubMed Central journal article supplement (PMC6345941; doi:10.1038/s41598-018-37334-8), 2019-01-24
Supplement: 41598_2018_37334_MOESM1_ESM.pdf [file 41598_2018_37334_MOESM1_ESM.pdf]

# Tumor resection ameliorates tumor-induced suppression of neuroinflammatory and behavioral responses to an immune challenge in a cancer survivor model

Jessica C. Santos, Savannah R. Bever, Gabriela Pereira-da-Silva, Leah M. Pyter

## SUPPLEMENTARY FIGURE 1

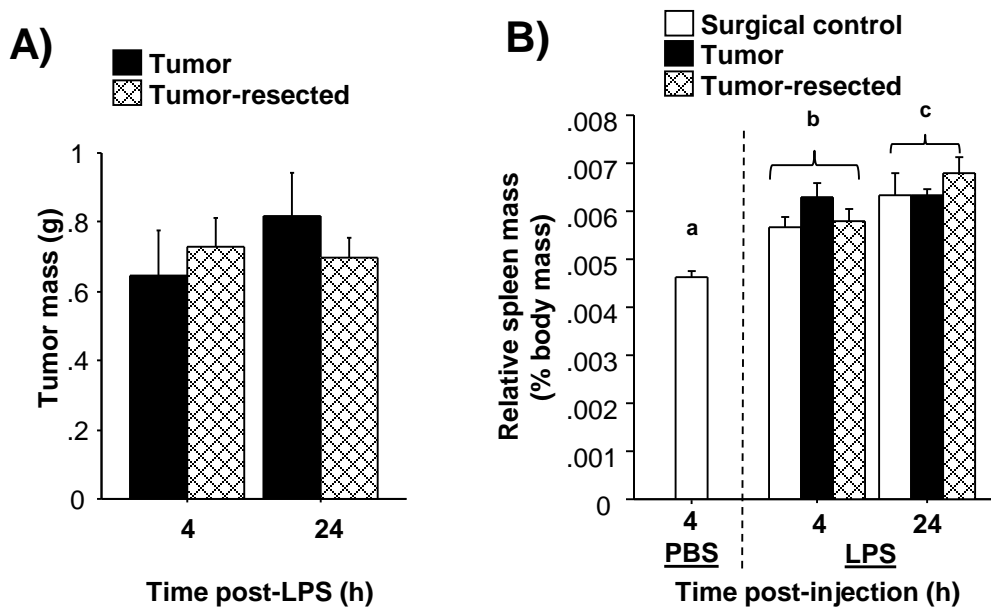

**Supplementary Figure 1. Effects of complete mammary tumor resection on spleen masses.** Mean  $\pm$  SEM (A) tumor mass taken at surgical resection (tumor-resected) or final tissue collection (tumor), (B) spleen mass relative to body mass in PBS-treated, tumor-free controls or 4 or 24 h post-LPS among tumor treatments.  $n=7-20$ /group; letters represent statistical differences.

# Tumor resection ameliorates tumor-induced suppression of neuroinflammatory and behavioral responses to an immune challenge in a cancer survivor model

Jessica C. Santos, Savannah R. Bever, Gabriela Pereira-da-Silva, Leah M. Pyter

## SUPPLEMENTARY FIGURE 2

### A) Tumor only; 4 h post-LPS

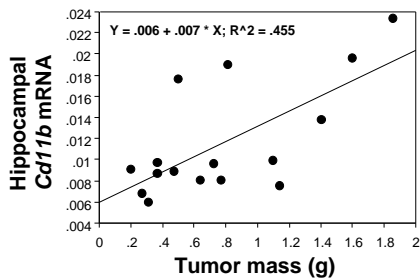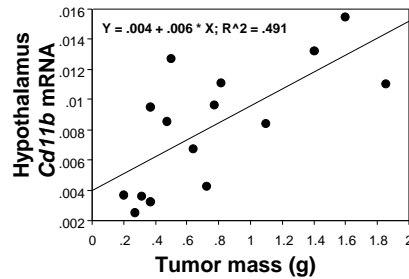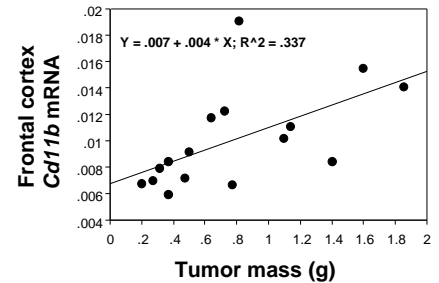

### B) Tumor-resected only; 24 h post-LPS

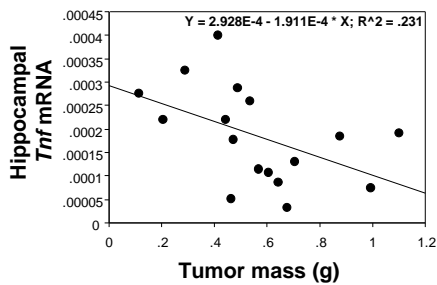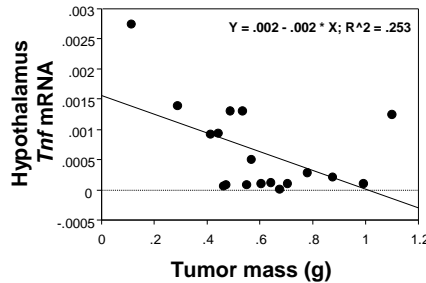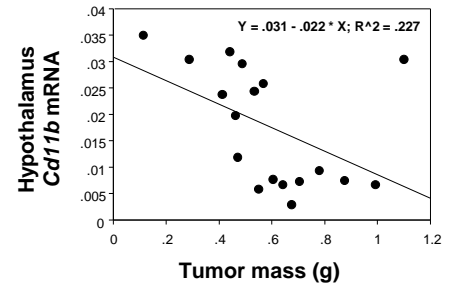

**Supplementary Figure 2. Correlation between tumor mass and neuroinflammatory response to LPS challenge.** Linear regressions between total mammary tumor mass, cortical and hippocampal *Cd11b* mRNA expression in tumor bearing mice 4 h after LPS injection (A). Correlation between prior tumor mass and the resolution of neuroinflammation in the hippocampus and hypothalamus 24 h post-LPS (B).
